# Supplementary material for: Differential endothelial cell cycle status in postnatal retinal vessels revealed using a novel PIP-FUCCI reporter and zonation analysis
Source: PubMed Central journal article supplement (PMC11564245; doi:10.1007/s10456-024-09920-0), 2024-05-25
Supplement: 10456_2024_9920_MOESM1_ESM.pdf [file 10456_2024_9920_MOESM1_ESM.pdf]

**Differential endothelial cell cycle status in postnatal retinal vessels revealed using a novel PIP-FUCCI reporter and zonation analysis**

Ziqing Liu<sup>1#</sup>, Natalie T Tanke<sup>2</sup>, Alexandra Neal<sup>1</sup>, Tianji Yu<sup>1</sup>, Tershona Branch<sup>1</sup>, Arya Sharma<sup>1</sup>, Jean G Cook<sup>3</sup>, Victoria L Bautch<sup>1,2,4,5\*</sup>

<sup>1</sup>Department of Biology, <sup>2</sup>Curriculum in Cell Biology and Physiology, <sup>3</sup>Department of Biochemistry and Biophysics, <sup>4</sup>McAllister Heart Institute, <sup>5</sup>Lineberger Comprehensive Cancer Center, The University of North Carolina, Chapel Hill, NC USA

\* corresponding author

# present address: Dept of Physiology, Medical College of Wisconsin, Milwaukee WI

**SUPPLEMENTAL FILE:**

1. Supplemental Figures (2)
2. Supplemental Resource Tables (2)

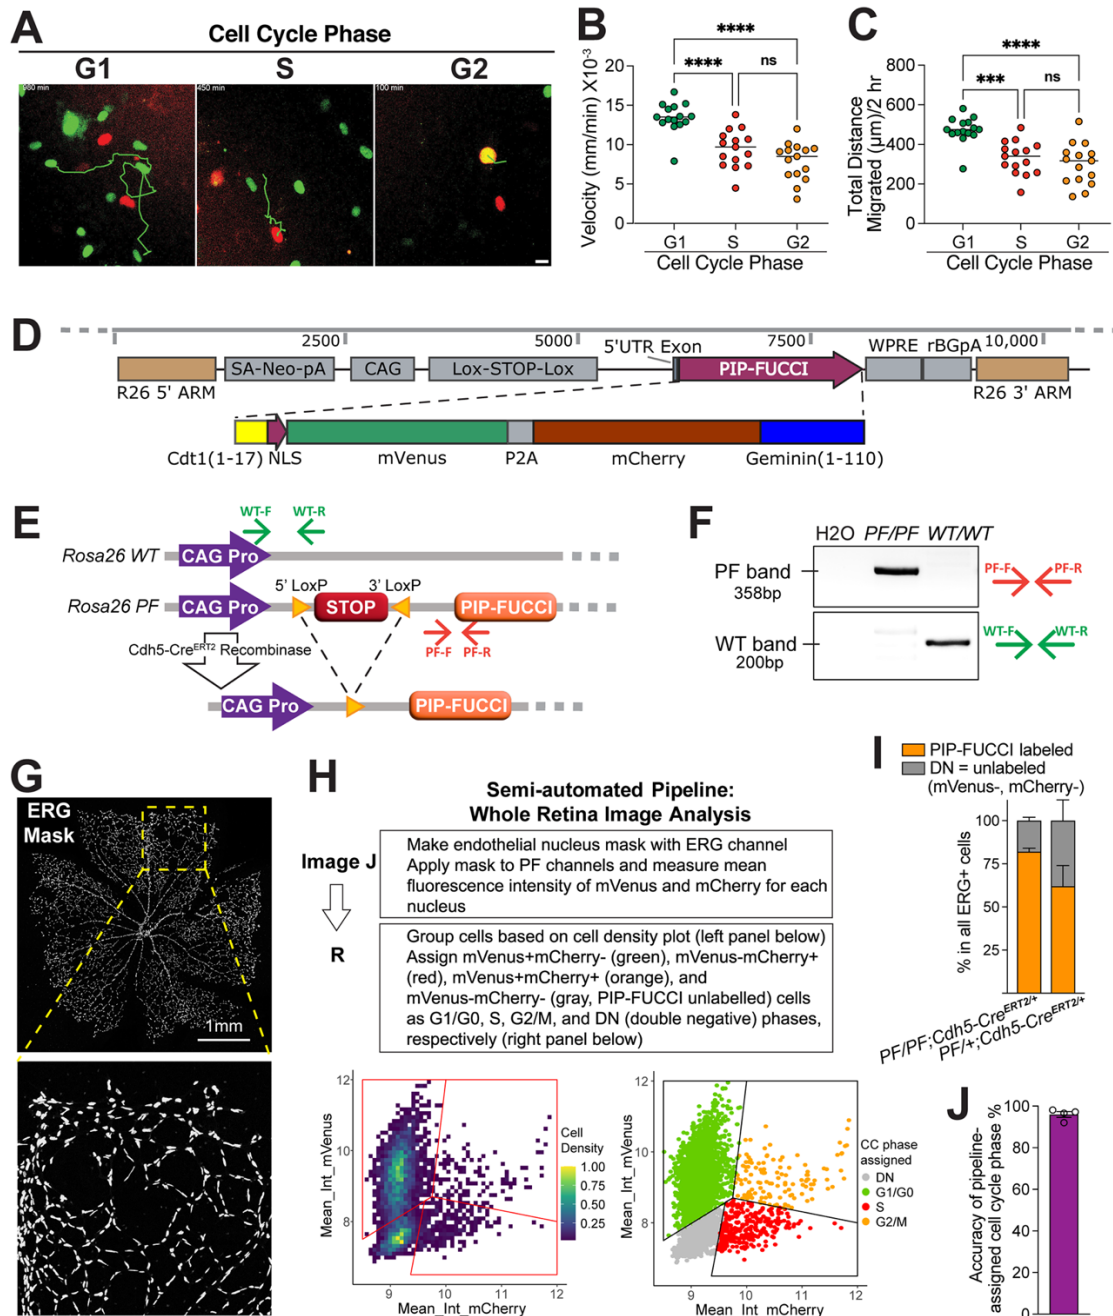

**Supplementary Figure 1. PIP-FUCCI reporter cells and mice and workflow for retina analysis. (A)** Representative cell migration traces (green lines) for indicated cell cycle phases. Scale bar, 50 $\mu$ m. **(B)** Quantification of velocity per 2 hr segment for indicated cell cycle phases. (n=15 cells/phase, 3 replicate movies). **(C)** Quantification of total distance migrated per 2 hr segment for indicated cell cycle phases (n=15 cells/phase, 3 replicate movies). \*\*\*\* p < 0.0001, \*\*\* p < 0.001, by one-way ANOVA & Tukey's multiple comparisons test. **(D)** Construct used to generate the PIP-FUCCI reporter mouse line. **(E)** Location of genotyping primers. **(F)** Example of genotyping results on DNA agarose gel. **(G)** Example of ERG mask. **(H)** Workflow for whole retina

analysis with ERG mask. **(I)** Quantification of % PIP-FUCCI labeled cells in ERG+ endothelial cells from *PF/PF;Cdh5-Cre<sup>ERT2/+</sup>* or *PF/+;Cdh5-Cre<sup>ERT2/+</sup>* retinas (n= 2 pups for each genotype). **(J)** Accuracy of manual vs. algorithm-assigned cell cycle phases from the same subset of endothelial cells of the same retinal images (PIP-FUCCI labeled and stained for IB4 and ERG). n = 4 pups.

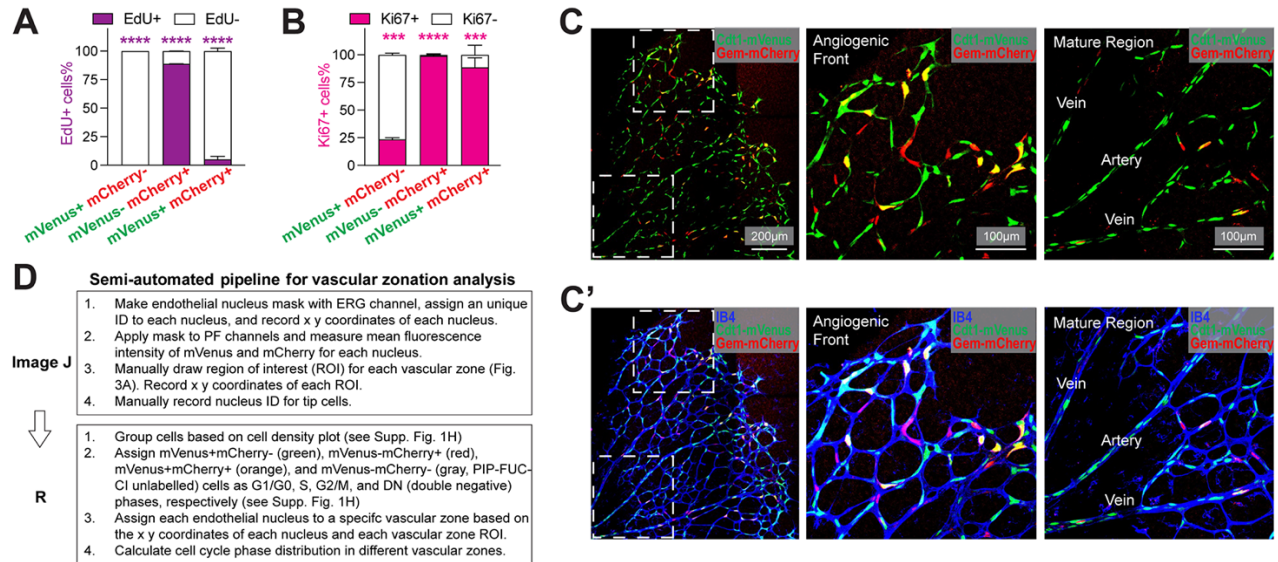

### Supplementary Figure 2. Workflow for vascular zonation analysis of the retina.

(A) Quantification of retinal endothelial cells EdU labeled relative to PIP-FUCCI status (related to Fig. 2D-F).  $n = 3$  pups. \*\*\*\*  $p < 0.0001$  by two-way ANOVA & Sidak's multiple comparisons test. (B) Quantification of Ki67+ retinal endothelial cells relative to PIP-FUCCI status (related to Fig. 2G-I).  $n = 2$  pups. \*\*\*\*  $p < 0.0001$ , \*\*\*  $p < 0.001$  by two-way ANOVA & Sidak's multiple comparisons test. (C-C') Representative image of one leaflet of a *PF/PF; Cdh5-Cre<sup>ERT2/+</sup>* retina stained for IB4 and ERG (same imaging fields as Fig. 2B, IB4 pseudo-colored blue in C'). Boxed areas in far left panel (scale bar, 200  $\mu$ m) magnified (scale bar, 100  $\mu$ m) in middle (Angiogenic Front) and far right (Mature Region) panels. (D) Workflow for semi-automated vascular zonation analysis of PIP-FUCCI retinal images with ERG mask.

**SUPPLEMENTARY TABLES****Supplementary Table 1. PCR Primers**

| <b>Primer Name</b> | <b>Primer Sequence</b>  | <b>Expected Products</b> |
|--------------------|-------------------------|--------------------------|
| Rosa26 WT-F        | TGGAGTTGCAGATCACGAGG    | WT = 225 bp              |
| Rosa26 WT-R        | TGTTTTGGAGGCAGGAAGCA    | PF = no band             |
| Rosa26 PF-F        | GCTAACCATGTTTCATGCCTTC  | WT = no band             |
| Rosa26 PF-R        | CGCCCTCGCCGGACACGCTGAAC | PF = 357 bp              |
| GenCre F           | GACCAGGTTTCGTTCACTCA    | WT = no band             |
| GenCre R           | TAGCGCCGTAAATCAAT       | Cre = 400 bp             |

**Supplementary Table 2. Antibodies**

| <b>Antibody</b>       | <b>Species</b> | <b>Company</b> | <b>Catalog No.</b> | <b>Dilution</b> | <b>Final Conc</b> |
|-----------------------|----------------|----------------|--------------------|-----------------|-------------------|
| IsolectinB4-biotin    | NA             | ThermoFisher   | I21414             | 1:100           | 10 µg/ml          |
| Streptavidin-Alexa405 | NA             | ThermoFisher   | S32351             | 1:50            | 20 µg/ml          |
| Ki67-Alexa647         | Rat            | Biolegend      | 652407             | 1:20            | 25 µg/ml          |
| ERG-Alexa647          | Rabbit         | Abcam          | ab196149           | 1:100           | 5 µg/ml           |
| DAPI                  | NA             | Sigma          | 10236276001        | 1:1,000         | 10 ng/ml          |
